# Supplementary material
Source: Springer Nature journal article supplement (https://www.springermedizin.de/resource/supplementary/12879_2011_1933_MOESM2_ESM.pdf/9443284)
Supplement: MOESM2 [file 9443284]

**APPENDIX: Search terms for herpes zoster complications**

| <b>APPENDIX B: Search terms for herpes zoster-related complications and symptoms</b> |               |                                                                                                           |
|--------------------------------------------------------------------------------------|---------------|-----------------------------------------------------------------------------------------------------------|
|                                                                                      | ICPC code     | Free text (synonyms, medical or lay names with or without grammatical mistakes of the following wordings) |
| <b>Upper respiratory tract, ENT complications</b>                                    |               |                                                                                                           |
| Otitis media                                                                         | H71/H72       | Otitis media (OME or OMA); middle ear infection/inflammation                                              |
| Upper respiratory tract infection                                                    | R74           | Upper respiratory tract infections (URTI or URI)                                                          |
| Lymphadenitis                                                                        | B70/B71       | Lymphadenitis; inflammation/infection of the lymph node                                                   |
| Tonsillitis                                                                          | R76           | Tonsillitis; inflammation/infection of the tonsils; angina                                                |
| Pharyngitis                                                                          | R74.02        | Pharyngitis; inflammation/infection of the throat or pharynx                                              |
| <b>Eye complications</b>                                                             |               |                                                                                                           |
| Conjunctivitis                                                                       | F70           | Conjunctivitis; inflammation of the eye                                                                   |
| Keratitis                                                                            | F73.2         | Keratitis; inflammation of the cornea                                                                     |
| Visus                                                                                | F05           | Visus, visual perception problems; Visual disturbance                                                     |
| Eyelid problems                                                                      | F16           | Problems of the eyelid; Eyelid symptom/complaint                                                          |
| <b>Lower respiratory tract complications</b>                                         |               |                                                                                                           |
| Pneumonia                                                                            | R81           | Pneumonia; infection/inflammation of the lung                                                             |
| Bronchitis                                                                           | R78           | Bronchitis                                                                                                |
| <b>Skin infectious/cutaneous complications</b>                                       |               |                                                                                                           |
| Phlegmon                                                                             |               | Phlegmon; flegmon; infection with streptococci of soft tissue                                             |
| Pyoderma                                                                             | S76           | Pyoderma (gangrenosum) (PG); pus in the skin                                                              |
| Abscess                                                                              | S10 / D95.2   | Abscess; Furuncle                                                                                         |
| Skin infection                                                                       | S11           | Skin infection; (secondary) inflammation/infection of the skin                                            |
| Cellulitis                                                                           | S10.3         | Cellulitis; bacterial infection of the deeper layers of the skin                                          |
| Scar Tissue                                                                          |               | Scar Tissue                                                                                               |
| Impetigo                                                                             | S84           | Impetigo ( <i>in Dutch krentenbaard</i> )                                                                 |
| <b>PHN</b>                                                                           |               |                                                                                                           |
| PHN                                                                                  | S70.2         | Post herpetic neuralgia (PHN)                                                                             |
| <b>Neurologic complications, other than PHN</b>                                      |               |                                                                                                           |
| Syncope                                                                              | A06           | Syncope; collapse; loss of consciousness                                                                  |
| Neuralgia (Trigeminus)                                                               | N92           | Neuralgia; pain in a nerve pathway                                                                        |
| Meningitis                                                                           | N71.01/N71.02 | Meningitis; inflammation of the meninges ( <i>in Dutch nekkramp</i> )                                     |
| Encephalitis                                                                         | N71.03        | Encephalitis; acute inflammation of the brain                                                             |
| Convulsion                                                                           | N07           | Convulsion; seizure ( <i>in Dutch (kooorts)stuipen</i> )                                                  |
| Ataxia (Cerebellitis)                                                                | N29           | Ataxia: dysfunction of the cerebellum                                                                     |
| Movement and stability dysfunction (others than ataxia)                              | N06           | Movement and stability dysfunction                                                                        |
| Vertigo                                                                              | N17           | Vertigo; dizziness                                                                                        |
| Facial palsy                                                                         | N91           | Facial(is) paresis; Facial paralysis/palsy                                                                |
| Pain face                                                                            | N03           | Pain face                                                                                                 |
| Coma                                                                                 | A07           | Coma; unconsciousness                                                                                     |
| Reye's syndrome                                                                      |               | Reye's syndrome                                                                                           |
| <b>Gastrointestinal tract complications</b>                                          |               |                                                                                                           |
| Stomatitis                                                                           | D83           | Stomatitis; viral infection of the mouth                                                                  |
| Gastroenteritis                                                                      | D73           | Gastroenteritis (GE); gastric flu; inflammation of the gastrointestinal tract                             |
| Pancreatitis                                                                         | D99.04        | Pancreatitis; inflammation of the pancreas                                                                |
| Appendicitis                                                                         | D88           | Appendicitis; inflammation of the appendix                                                                |
| <b>Haematological complications and coagulation disorders</b>                        |               |                                                                                                           |
| Thrombocytopenia                                                                     | B83.02        | Thrombocytopenia; reduced platelet (thrombocyte)                                                          |
| Haemorrhage                                                                          | A10           | Haemorrhage; bleeding; loss of blood                                                                      |
| Coagulation                                                                          | B83           | Coagulation: formation of a blood clot (problems)                                                         |
| <b>Complications due to (systemic) bacterial infections</b>                          |               |                                                                                                           |
| Sepsis                                                                               | W70           | Sepsis; Blood Infection                                                                                   |
| Osteomyelitis                                                                        | L70.01        | Osteomyelitis; inflammation of the bone                                                                   |
| Pyogen arthritis                                                                     | L70.02        | (pyogen) arthritis; arthritis caused by <i>Streptococcus pyogenes</i>                                     |
| Necrotizing fasciitis                                                                |               | Necrotizing fasciitis; infection of soft tissue                                                           |
| <b>Death</b>                                                                         |               |                                                                                                           |
| Death                                                                                | A96           | Death; deceased                                                                                           |
| <b>Symptoms</b>                                                                      |               |                                                                                                           |
| Mouth blisters                                                                       | D83.02        | Mouth blister ( <i>in Dutch aften</i> )                                                                   |
| Coughing                                                                             | R05           | Cough; sputum                                                                                             |
| Snivelling                                                                           | A15           | Snivelling; whining                                                                                       |
| Fever                                                                                | A03           | Fever; pyrexia; temperature rises                                                                         |
| Fatigue                                                                              | A04           | Fatigue; exhaustion; listlessness                                                                         |
| Problems Sleeping                                                                    |               | Problems with sleeping                                                                                    |
| Emesis/Vomiting                                                                      | D10           | Emesis; Vomiting                                                                                          |
| Problems Eating/drinking                                                             | T03/T04       | Problems Eating; Problems drinking; feeding problems                                                      |
| Pruritis                                                                             | S02           | Pruritis; Itching                                                                                         |

|                      |               |                                                          |
|----------------------|---------------|----------------------------------------------------------|
| Exanthema            | S06/S07       | Skin rash; exanthema; exanthem                           |
| Headache             | N01           | Headache; pain or discomfort in the head. scalp. or neck |
| Dehydration/Diarrhea | D11/ D70/ T11 | Dehydration; Diarrhea; loss of body fluids               |
